# Supplementary material for: Cationic and anionic reverse micelles as the molecular crowding container for G-quadruplex structure
Source: Royal Society of Chemistry journal article supplement (doi:10.1039/c4ra02141j), 2014-01-01
Supplement: c4ra02141j1.pdf [file c4ra02141j1.pdf]

# **Supporting Information**

## **Cationic and Anionic Reverse Micelles as the Molecular Crowding Container for G-quadruplex Structure**

Meng-Chieh Ho and Chih-Wei Chang

*Department of Chemistry, National Changhua University of Education,  
Changhua 50058, Taiwan*



## Materials and Methods

### Materials

The high performance liquid chromatography purified human telomere sequence (5'-AG<sub>3</sub>(T<sub>2</sub>AG<sub>3</sub>)<sub>3</sub>, the Hum 22) was purchased from Sigma Aldrich and was used without further purification. The CTAB (BioXtra, >99%), AOT (BirXtra, >97%), TMPyP4 (>97%), NaCl (BioXtra, >99.5%) and KCl (For molecular biology, >99%) were also purchased from Sigma Aldrich and were used as received. The CTAC was purchased from Alfa Aser (96%). The isooctane (>99%) and 1-hexanol (>99%) were purchased from Macron<sup>TM</sup> and Alfa Aser, respectively. The deionized water (resistivity>18.2 MΩ-cm at 25°C) was obtained from Barnstead<sup>TM</sup> EasyPure<sup>TM</sup> II water purification system (Thermo Scientific<sup>TM</sup>) and was used in all experiments.

### Sample preparation

#### DNA preparation

The Hum 22 was dissolved in deionized water. The single strand concentration of oligonucleotide was estimated by measuring the absorbance at 260 nm ( $\epsilon=228500 \text{ M}^{-1} \text{ cm}^{-1}$ ). After determining the concentration of oligonucleotide, the proper volume of high concentration oligonucleotide was added to the Tris buffer solution (10 mM tris, pH=7.4) or the buffers that containing Na<sup>+</sup> or K<sup>+</sup> ions. The samples were heated to 95°C for 10 minutes and slowly cooled down to the room temperature. After cooling down to the room temperature, the samples were stored in the 4°C refrigerator for at least 8 hours to ensure the formation of G-quadruplex structure.

#### Preparation of DNA encapsulated reverse micelles.

The cationic or anionic surfactants were dissolved in organic solvents (0.1M AOT in isooctane, 0.2 M CTAB and CTAC in isooctane: 1-hexanol=7:1 solution). The proper amounts of buffer or highly concentrate nucleic acid stock solution were directly injected into the solution ( $\omega=20$  in AOT,  $\omega=25$  in CTAB and  $\omega=20$  in CTAC RMs) and sonicated for 1 hr. In RMs, the final concentration of DNA was control at 2  $\mu\text{M}$ .

#### CD spectroscopy

The CD spectra were obtained using Jasco J-810 spectropolarimeter (JASCO, Japan). The spectra were obtained in a 1 cm path length quartz cuvette. The temperature was controlled at 25°C using temperature accessory (JASCO, PTC-423S). The spectra were recorded from 220 to 350 nm at a scanning rate of 100 nm/min. Each spectrum was scanned three times and the background CD spectrum was subtracted.

#### UV-Vis steady state spectra, melting curve and Job plot analysis

The UV-Vis absorption spectra were obtained using a Cary 100 spectrophotometer (Cary-100, Agilent) with 1 cm quartz cuvette. The temperature of the samples was



controlled with a peltier thermostatted multicell holder accessory. The melting curves of the samples were monitored at 295 nm and increasing with the temperature gradient of 0.4°C/nm. For the Job plot measurements, the temperature of the samples were controlled at 25°C, and the total concentration of the Hum 22+TMPyP4 was 2µM in buffer or 20% PEG 400 and 1µM in CTAB RMs.

### **Estimation of the concentration of free Na<sup>+</sup> ions in AOT RMs**

For the AOT RMs ( $\omega=20$ ), the hydrodynamics radius is 6 nm, considering the thickness of the surfactant monolayer is ~1 nm, the radius of the central water pool is ~5 nm, which corresponds to the volume of  $5.24 \times 10^{-22}$  liter. Because each droplet is composed of ~300 surfactants, the concentration of the total available Na<sup>+</sup>

$$= \frac{300}{6.02 \times 10^{23}} \times \frac{1}{5.24 \times 10^{-22}} = 0.95 \text{ M}$$

According to the MD simulation result, about 16 % of Na<sup>+</sup> ions (~150 mM) is free dissociated in  $\omega=10$  AOT RMs. Since the percentage of the dissociated Na<sup>+</sup> will also increase with the  $\omega$ , we expected that the concentration of the dissociated Na<sup>+</sup> in  $\omega=20$  AOT RMs should be in the range between 200~300 mM, which is comparable to the 300 mM Na<sup>+</sup> ions we used.



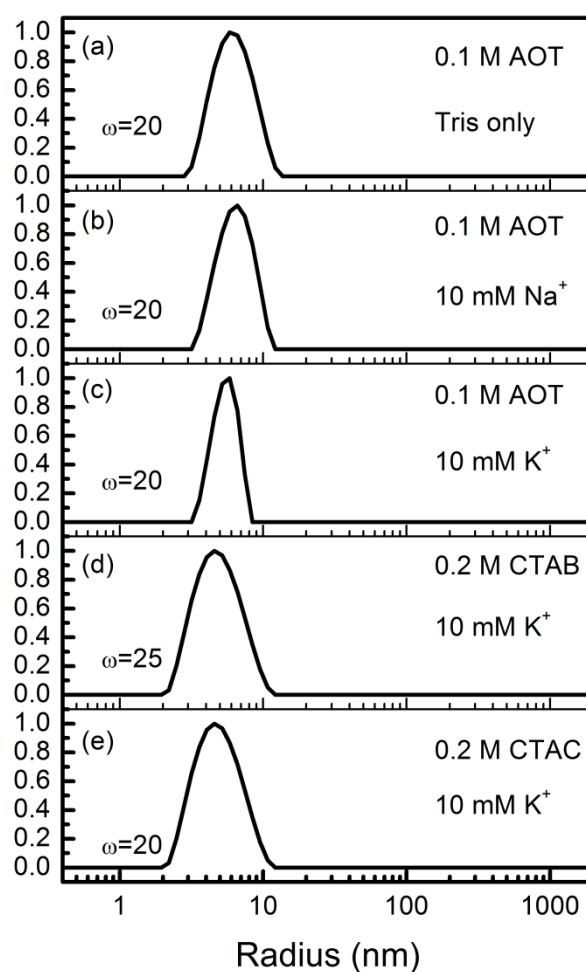

Figure S<sub>1</sub>: The size distribution of (a-c) AOT, (d) CTAB and (e)CTAC reverse micelles. As depicted, the hydrodynamic radius of the reverse micelle was ~6 nm in all cases.



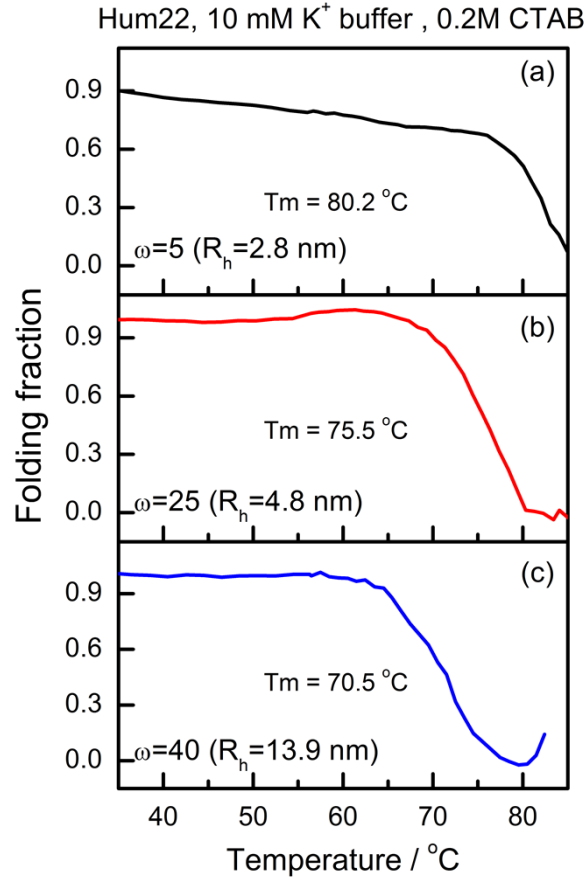

Figure S<sub>2</sub>: The melting curve of Hum 22 in (a)  $\omega=5$  (b)  $\omega=25$  (c)  $\omega=40$  CTAB RMs. The hydrodynamics radius ( $R_h$ ) was estimated by the DLS method.



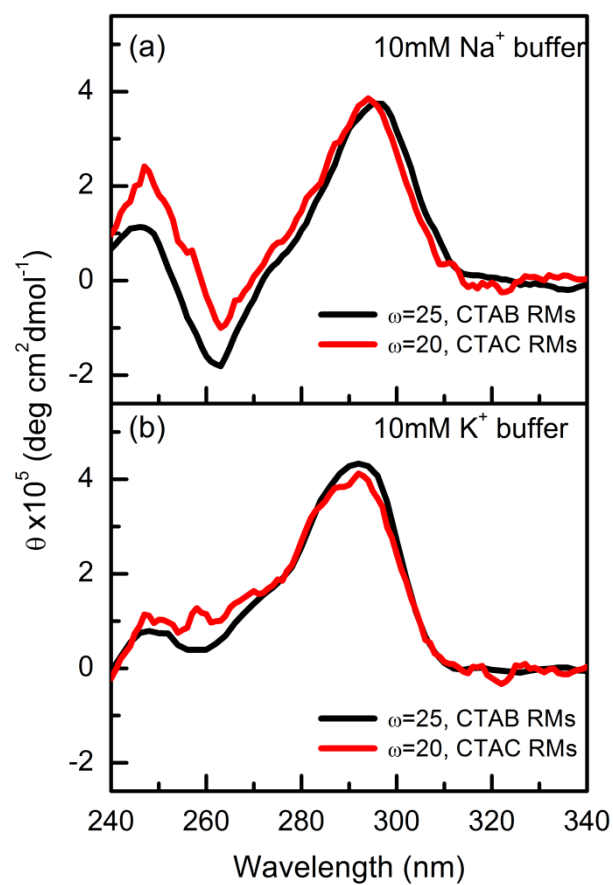

Figure S<sub>3</sub>: The CD spectra of Hum 22 in CTAB (black) and CTAC (red) RMs containing 10 mM (a) NaCl and (b) KCl Tris buffer solutions.



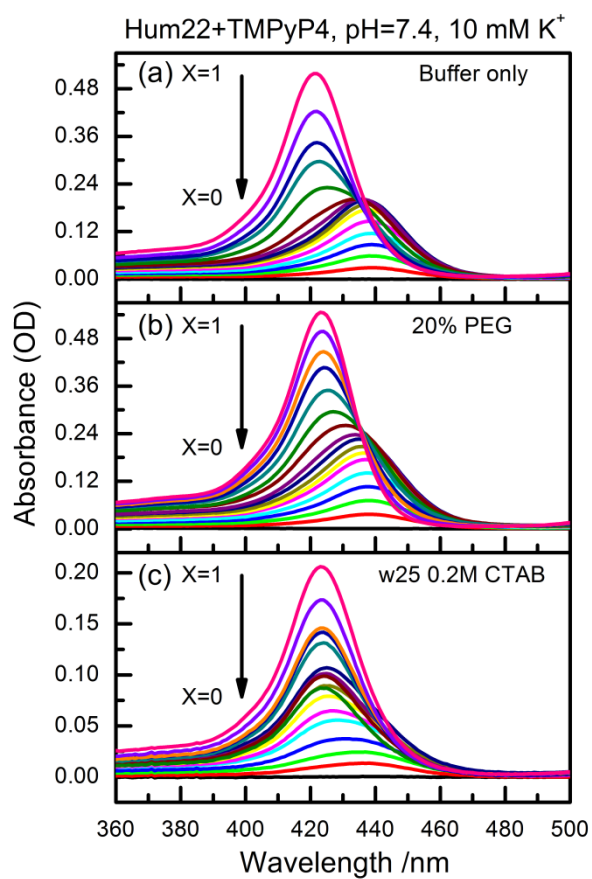

Figure S<sub>4</sub>: The absorption spectra of TMPyP4 binding with different mole fraction of Hum 22 in (a) Buffer (b) 20% PEG 400 and (c) CTAB RMs.



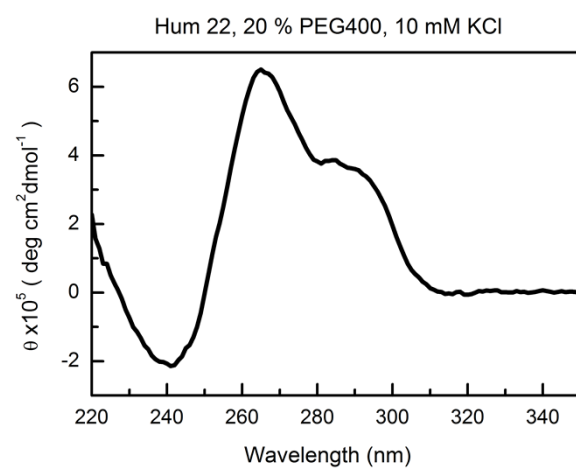

Figure S<sub>5</sub>: The CD spectrum of Hum 22 in 20 % PEG400 solution.
